# Supplementary material for: Photothermal-responsive Prussian blue nanocages loaded with thrombin for tumor starvation therapy and photothermal therapy
Source: Royal Society of Chemistry journal article supplement (doi:10.1039/d3bm00526g), 2023-01-01

EDS 分层图像 3

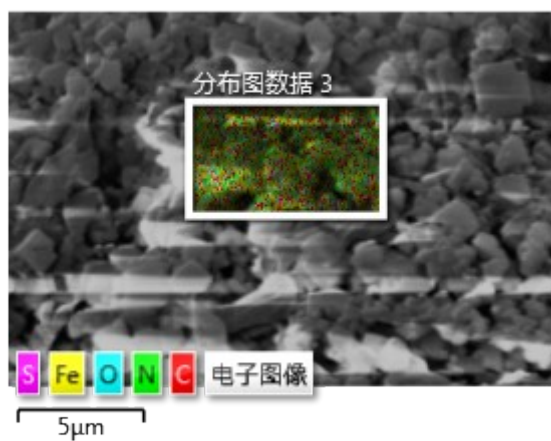

电子图像 3

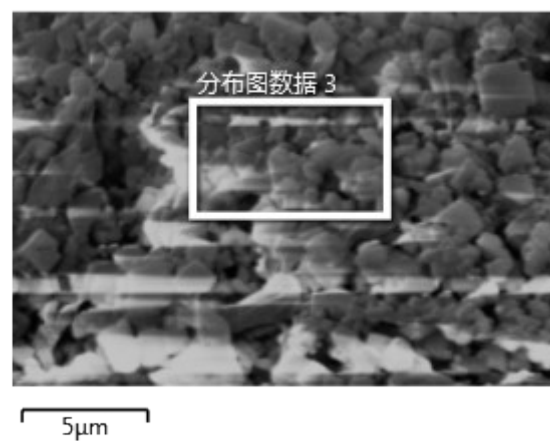

C K $\alpha$ 1\_2

分布图数据 3

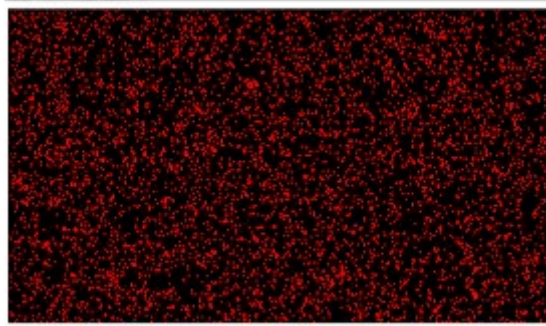

2.5 $\mu$ m

N K $\alpha$ 1\_2

分布图数据 3

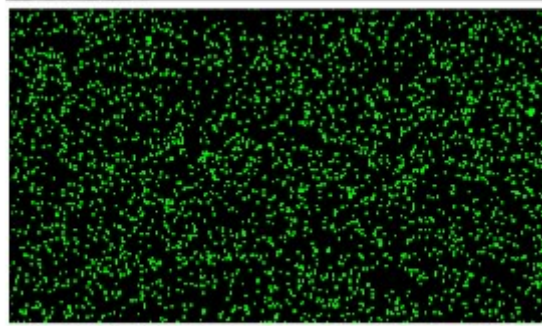

2.5 $\mu$ m

Fe L $\alpha$ 1,2

分布图数据 3

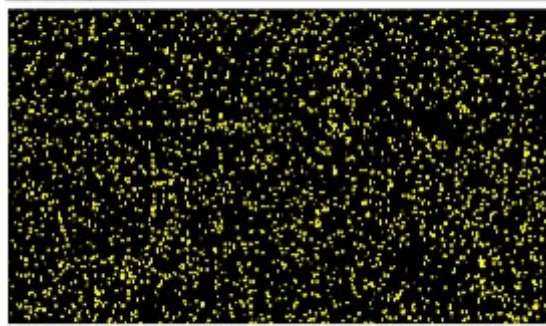

2.5 $\mu$ m

O K $\alpha$ 1

分布图数据 3

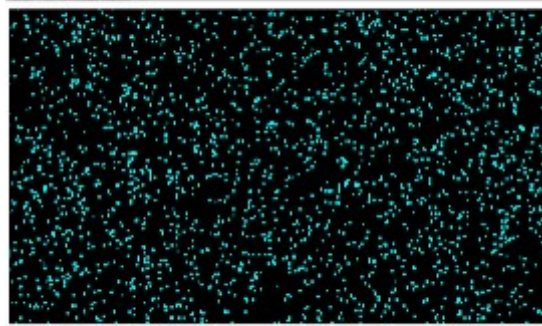

2.5 $\mu$ m

S K $\alpha$ 1

分布图数据 3

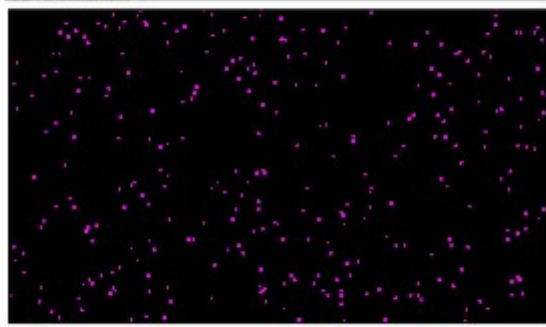

2.5 $\mu$ m

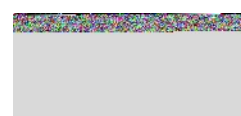

Supplement: d3bm00526g1.pdf [file d3bm00526g1.pdf]
